# Supplementary material
Source: Springer Nature journal article supplement (https://www.springermedizin.de/resource/supplementary/12889_2013_6814_MOESM7_ESM.pdf/9499042)
Supplement: MOESM7 [file 9499042]

**Table 6: Univariate and multivariate analysis of factors associated with HPV infection, among Nigerian women**

| Characteristics             | Univariate        | p-value | Multivariate      | p-value |
|-----------------------------|-------------------|---------|-------------------|---------|
|                             | PR (95% CI)       |         | PR (95% CI)       |         |
| <b>Marital Status</b>       |                   | 0.17    |                   | 0.16    |
| - Married                   | 1.00              |         | 1.00              |         |
| - Not married               | 0.84 (0.65, 1.08) |         | 0.96 (0.89, 1.04) |         |
| <b>HIV Status</b>           |                   | 0.08    |                   | 0.46    |
| - Positive                  | 1.00              |         | 1.00              |         |
| - Negative                  | 0.81 (0.64, 1.02) |         | 0.98 (0.90, 1.07) |         |
| <b>Douching</b>             |                   | 0.14    |                   | 0.43    |
| - Yes                       | 1.00              |         | 1.00              |         |
| - No                        | 1.20 (0.95, 1.51) |         | 1.05 (0.98, 1.13) |         |
| <b>Menstrual sanitation</b> |                   | 0.09    |                   | 0.14    |
| - Cloth                     | 1.00              |         | 1.00              |         |
| - Tissue paper              | 1.63 (1.00, 2.67) |         | 1.18 (1.01, 1.38) |         |
| - Sanitary pads             | 1.17 (0.74, 1.84) |         | 1.01 (0.89, 1.15) |         |
| - Tampons                   | 1.81 (0.89, 3.70) |         | 1.18 (0.88, 1.58) |         |
| <b>BMI</b>                  |                   | <.001   |                   | <.001   |
| - 18.5 – 24.9               | 1.00              |         | 1.00              |         |
| - 25.0 – 29.9               | 2.12 (1.47, 3.06) |         | 1.26 (1.14, 1.39) |         |
| - 30+                       | 2.35 (1.66, 3.33) |         | 1.29 (1.18, 1.42) |         |
| <b>Education</b>            |                   | 0.47    |                   |         |
| - Primary                   | 1.00              |         |                   |         |
| - Secondary                 | 1.04 (0.72, 1.50) |         |                   |         |
| - Tertiary                  | 1.24 (0.82, 1.87) |         |                   |         |
| <b>Age at sexual debut</b>  |                   | 0.66    |                   |         |
| - < 18                      | 1.00              |         |                   |         |
| - 18 – 21                   | 1.11 (0.81, 1.54) |         |                   |         |
| - 22 – 25                   | 1.14 (0.77, 1.69) |         |                   |         |
| - > 25                      | 1.09 (0.69, 1.71) |         |                   |         |
| <b>Total sex partners</b>   |                   | 0.77    |                   |         |
| - 1                         | 1.00              |         |                   |         |
| - 2 – 3                     | 0.85 (0.65, 1.11) |         |                   |         |
| - 4 – 5                     | 0.64 (0.42, 0.97) |         |                   |         |
| - ≥ 6                       | 0.93 (0.65, 1.34) |         |                   |         |
| <b>Contraceptive use</b>    |                   | 0.62    |                   |         |
| - Yes                       | 1.00              |         |                   |         |
| - No                        | 0.94 (0.74, 1.20) |         |                   |         |

**Condom use**

0.55

- Yes

1.00

- No

1.52 (0.31, 7.57)

---
